# Supplementary material for: Comprehensive analysis to identify the RP11–478C19.2/ E2F7 axis as a novel biomarker for treatment decisions in clear cell renal cell carcinoma
Source: PubMed Central journal article supplement — Transl Oncol. 2022 Aug 30;25:101525. doi: 10.1016/j.tranon.2022.101525 (PMC9445397; doi:10.1016/j.tranon.2022.101525), 2022-08-30
Supplement: mmc2.pdf [file mmc2.pdf]

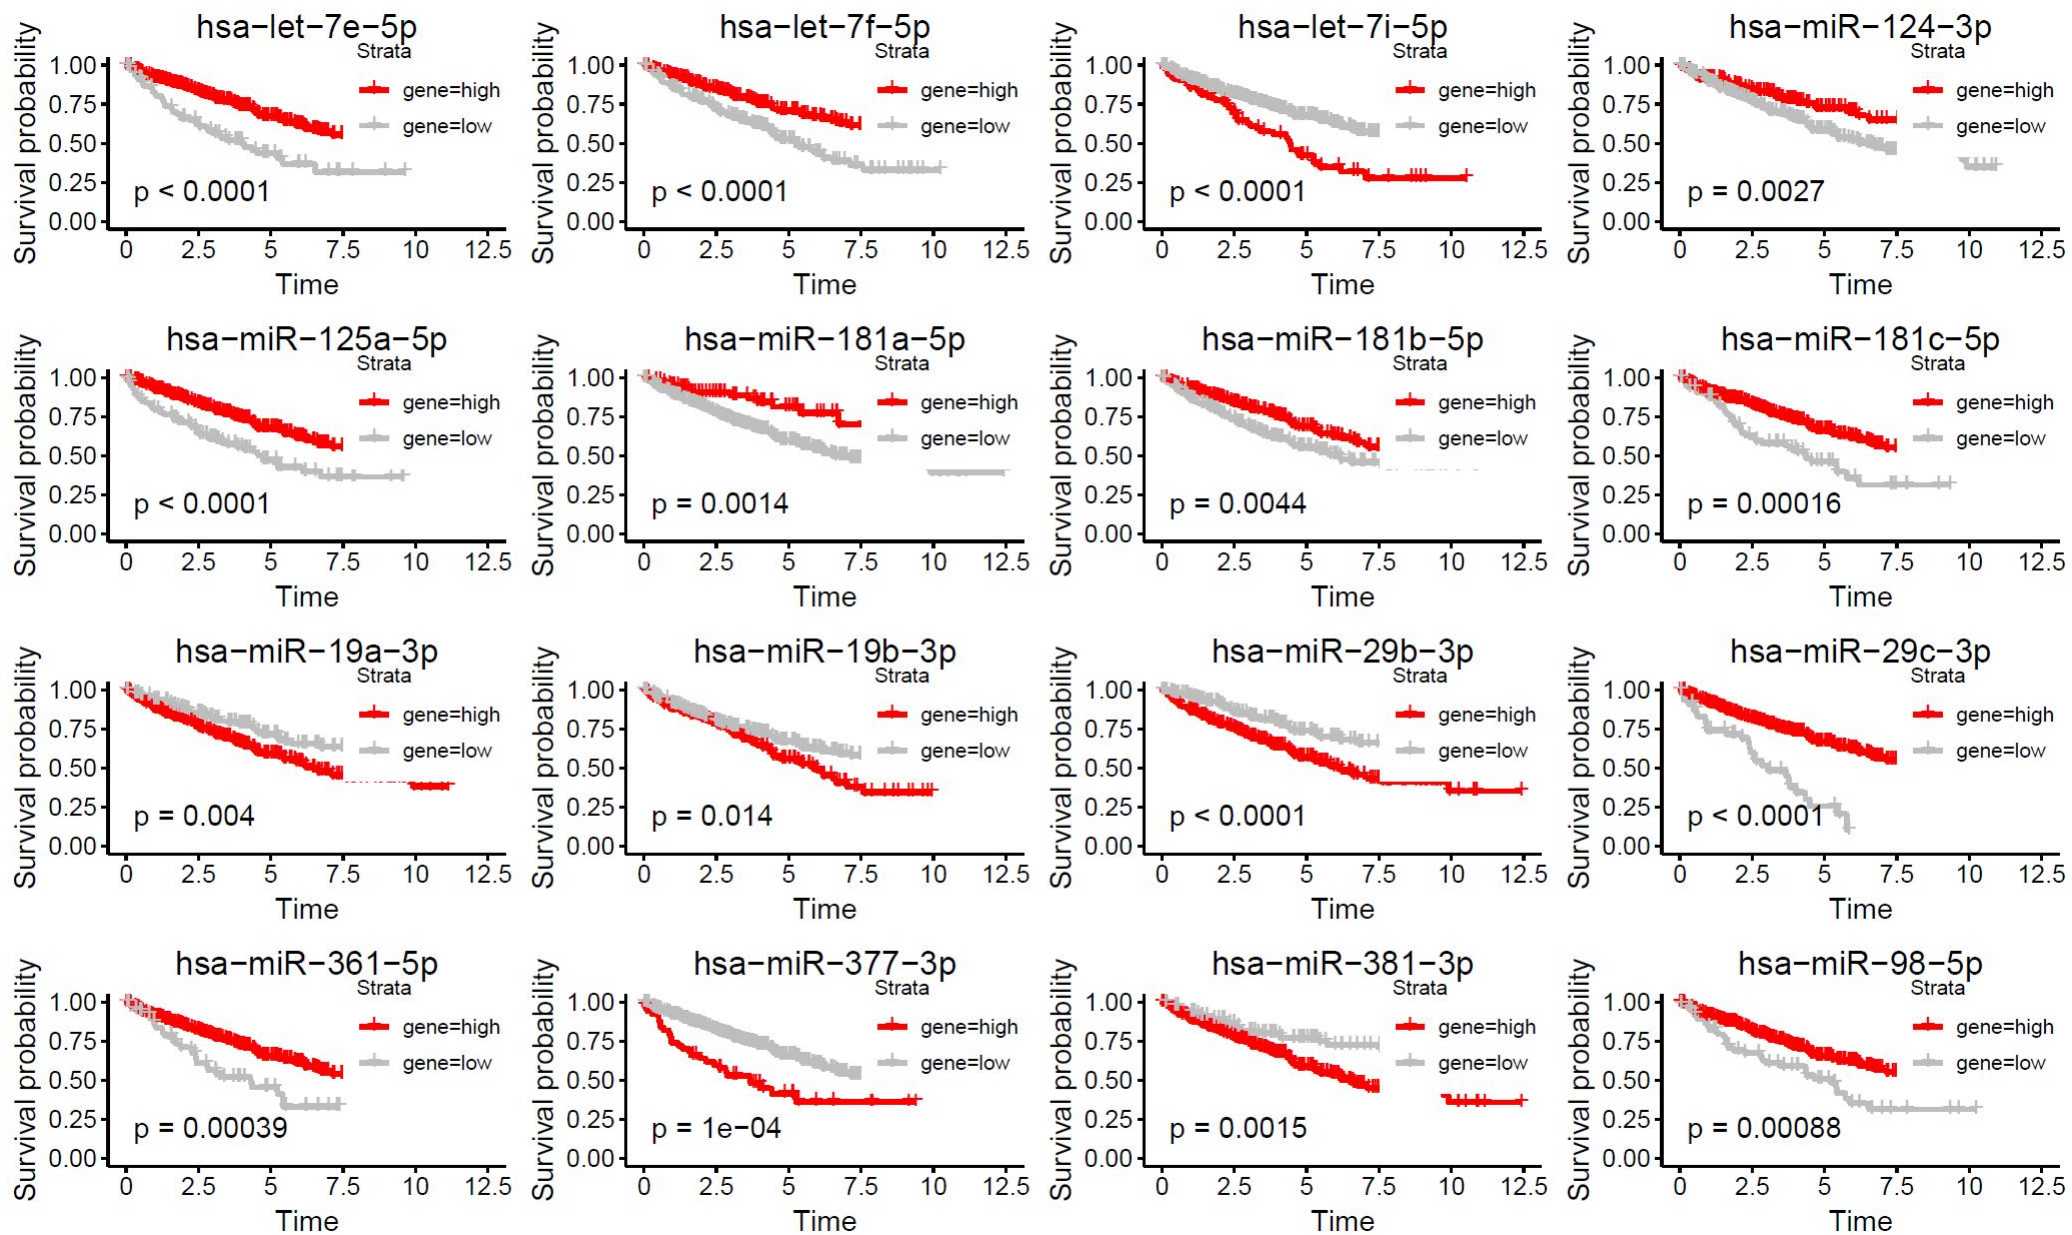

Figure S1: Overall survival for the DE miRNAs related to prognosis in KIRC

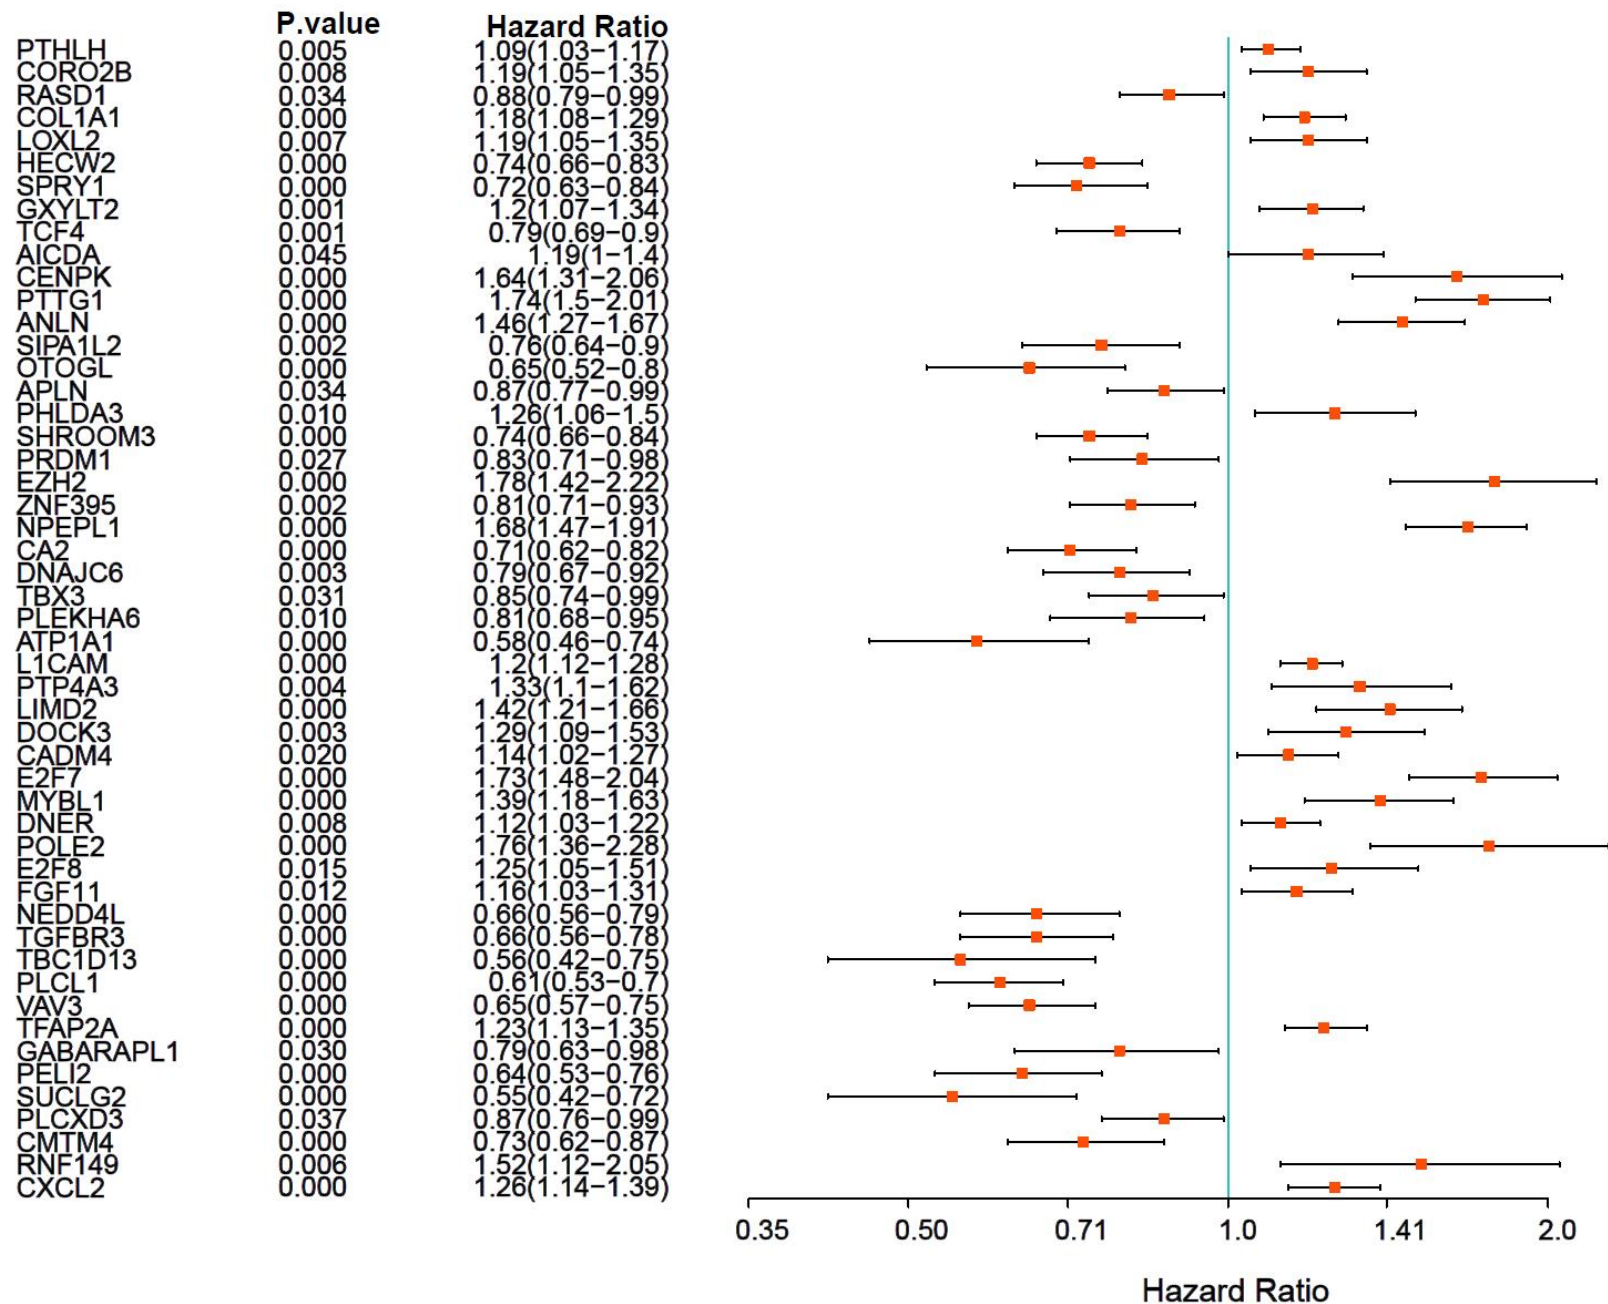

Figure S2: Overall survival for the DE mRNAs related to prognosis in KIRC



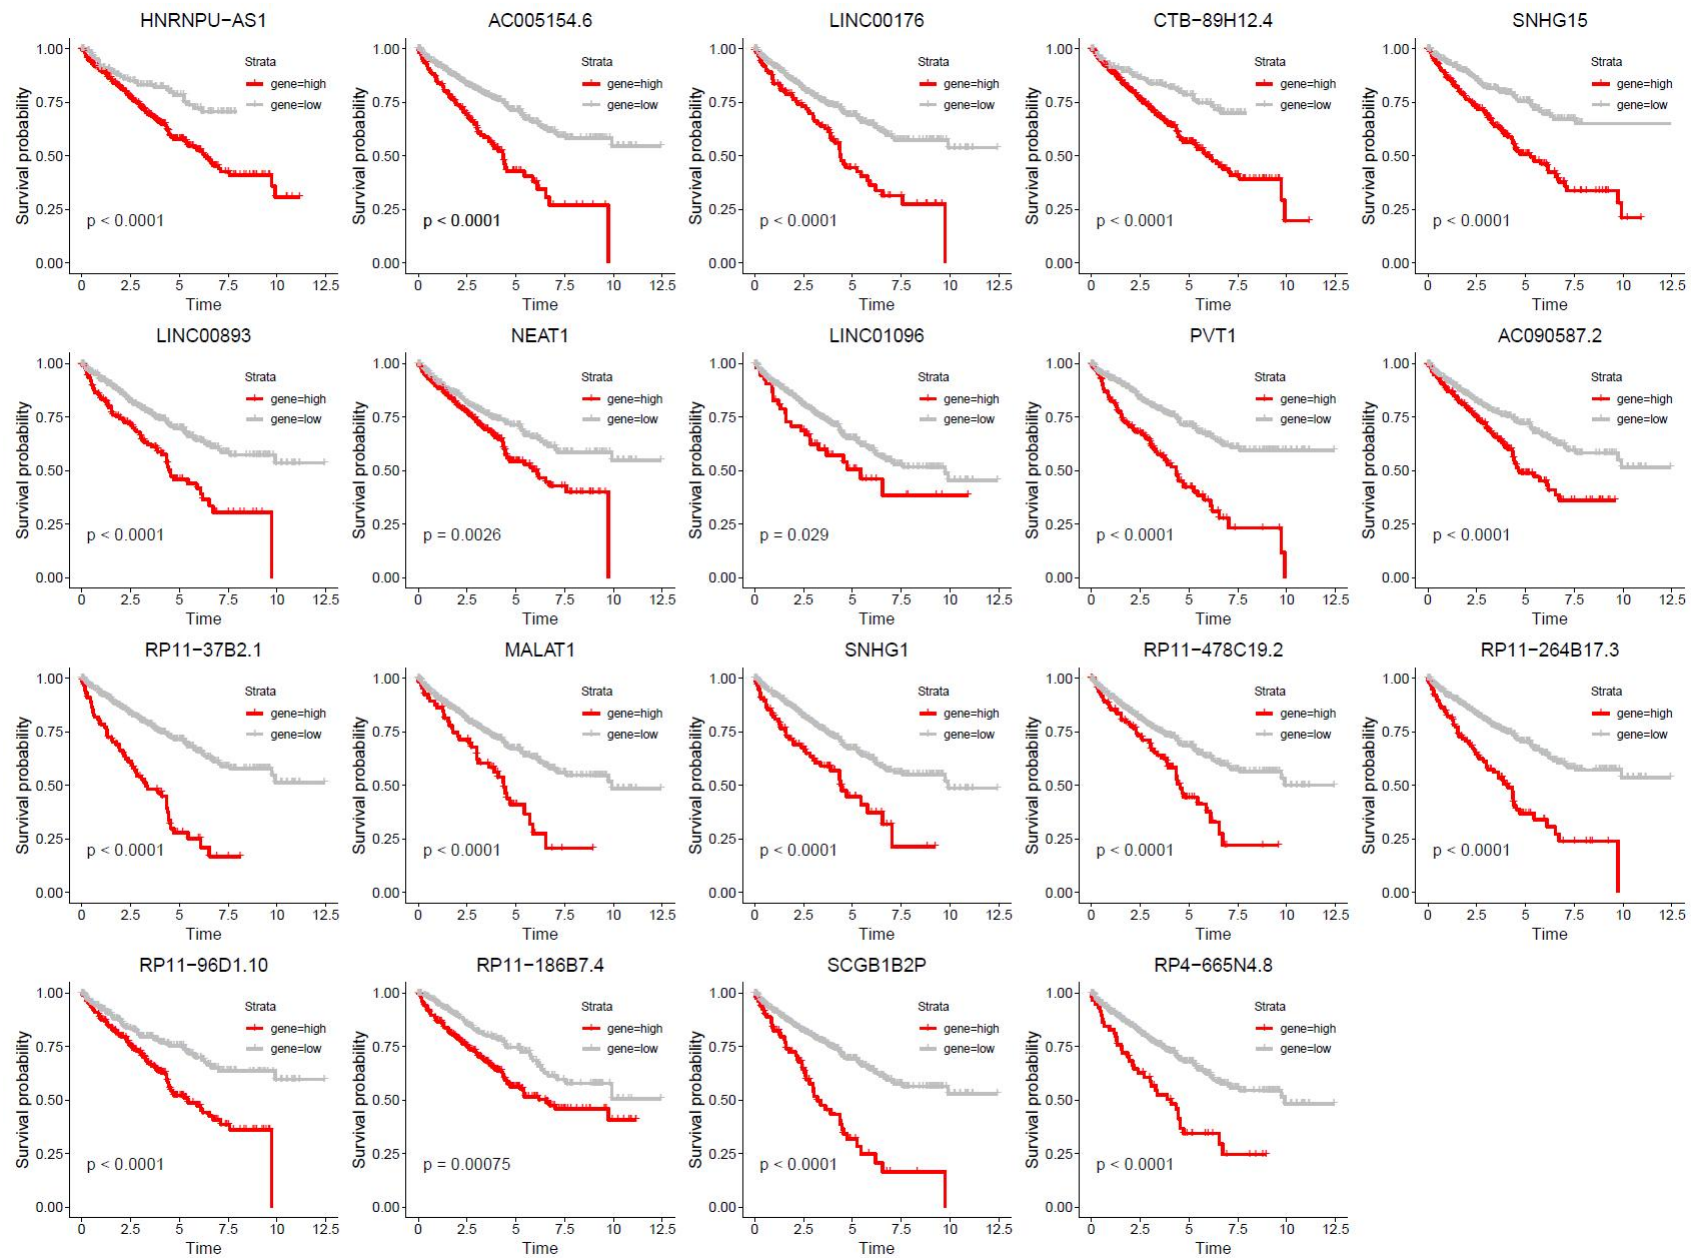

Figure S3: Overall survival for the DElncRNAs related to prognosis in KIRC

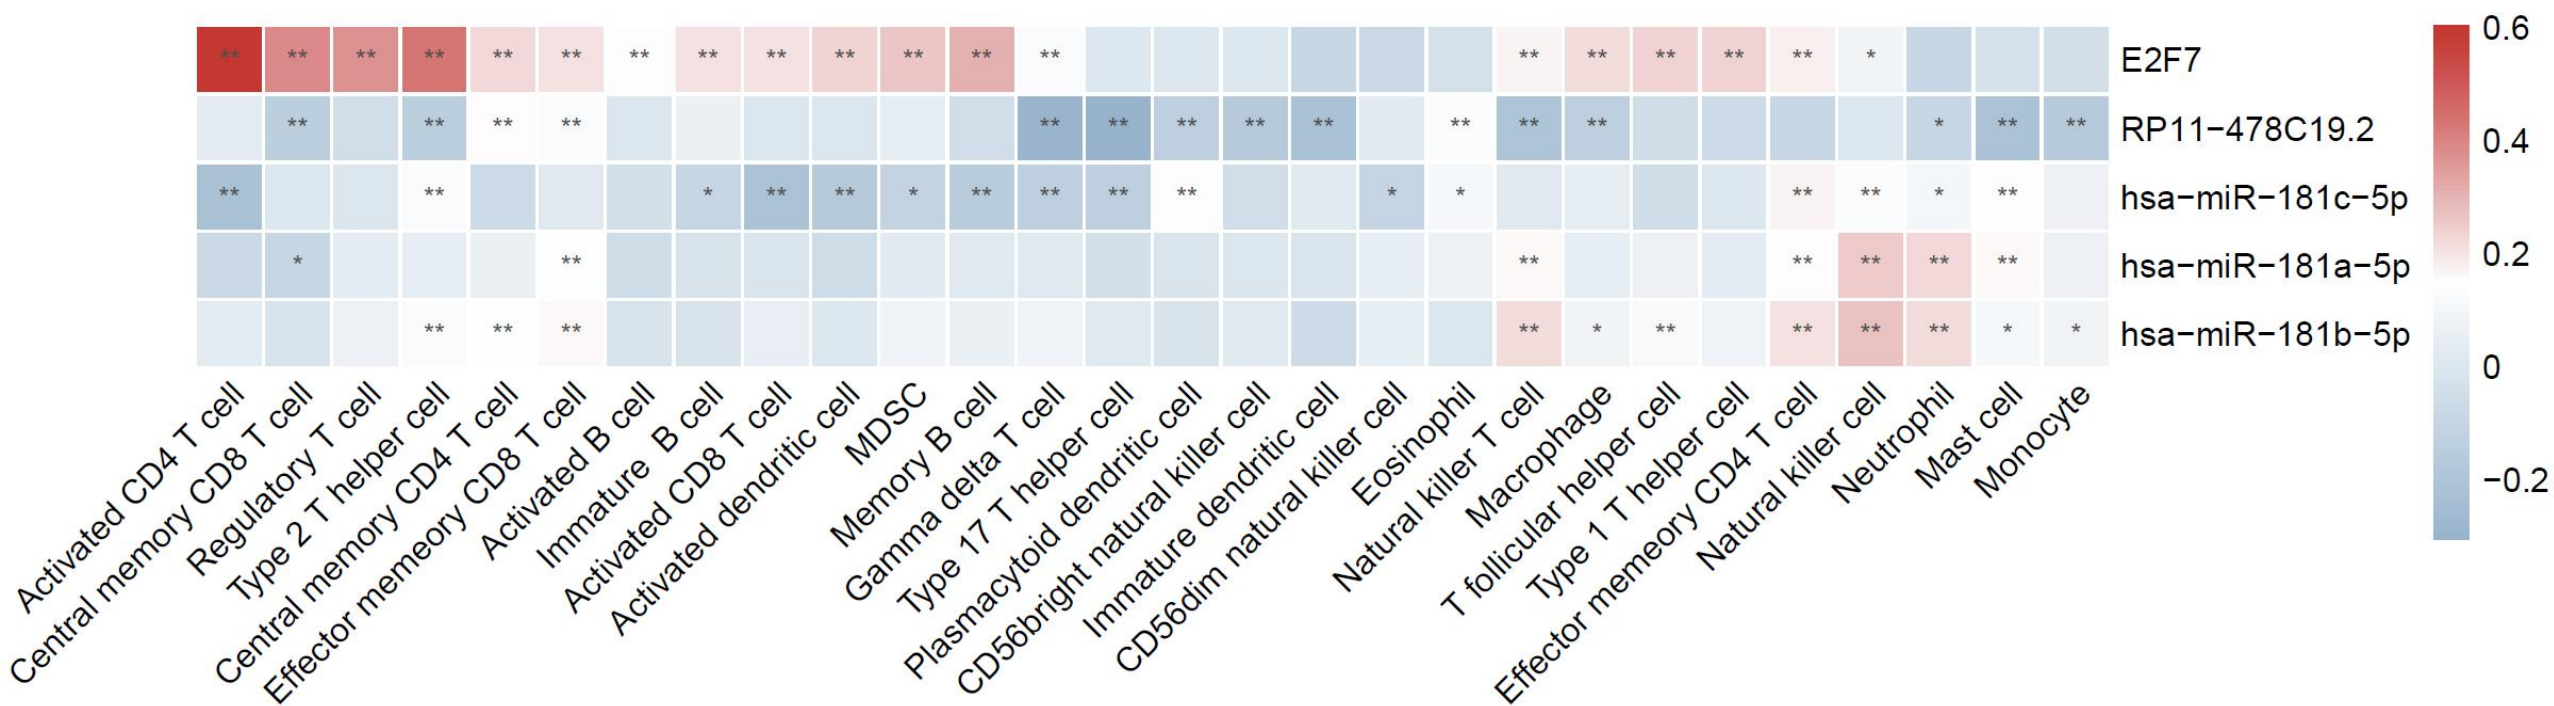

Figure S4: Association between each RNA in the RP11-478C19.2/E2F7 axis and the immune cell infiltration levels. (\*  $p < 0.05$ , \*\*  $p < 0.01$ )

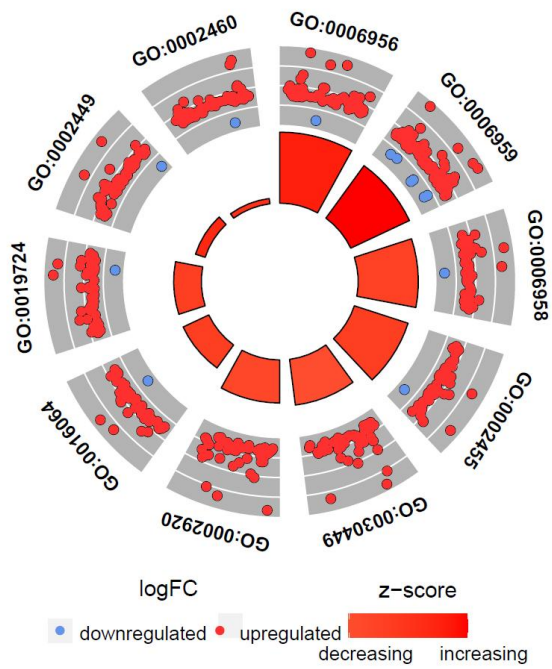

| ID         | Description                                                                                                               |
|------------|---------------------------------------------------------------------------------------------------------------------------|
| GO:0006956 | complement activation                                                                                                     |
| GO:0006959 | humoral immune response                                                                                                   |
| GO:0006958 | complement activation, classical pathway                                                                                  |
| GO:0002455 | humoral immune response mediated by circulating immunoglobulin                                                            |
| GO:0030449 | regulation of complement activation                                                                                       |
| GO:0002920 | regulation of humoral immune response                                                                                     |
| GO:0016064 | immunoglobulin mediated immune response                                                                                   |
| GO:0019724 | B cell mediated immunity                                                                                                  |
| GO:0002449 | lymphocyte mediated immunity                                                                                              |
| GO:0002460 | adaptive immune response based on somatic recombination of immune receptors built from immunoglobulin superfamily domains |

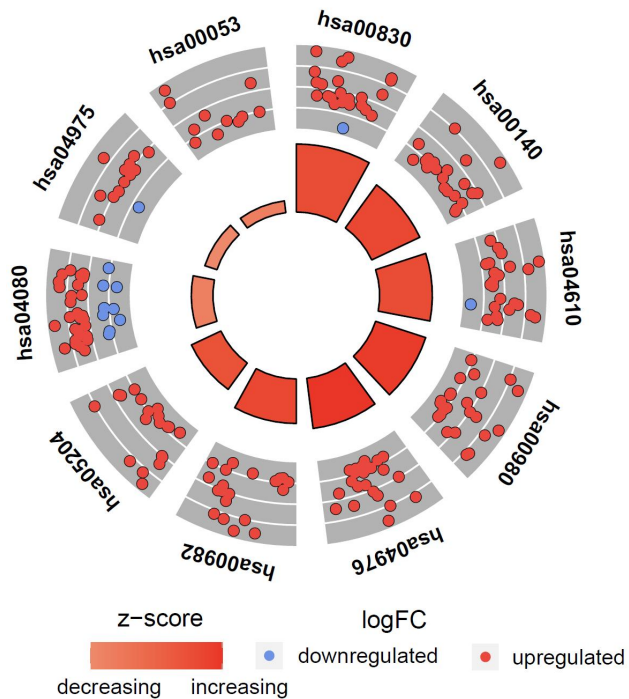

| ID       | Description                                  |
|----------|----------------------------------------------|
| hsa00830 | Retinol metabolism                           |
| hsa00140 | Steroid hormone biosynthesis                 |
| hsa04610 | Complement and coagulation cascades          |
| hsa00980 | Metabolism of xenobiotics by cytochrome P450 |
| hsa04976 | Bile secretion                               |
| hsa00982 | Drug metabolism – cytochrome P450            |
| hsa05204 | Chemical carcinogenesis – DNA adducts        |
| hsa04080 | Neuroactive ligand–receptor interaction      |
| hsa04975 | Fat digestion and absorption                 |
| hsa00053 | Ascorbate and aldarate metabolism            |

Figure S5: GO and KEGG analysis of the DEmRNAs of the two clusters.



Pathway Enrichment

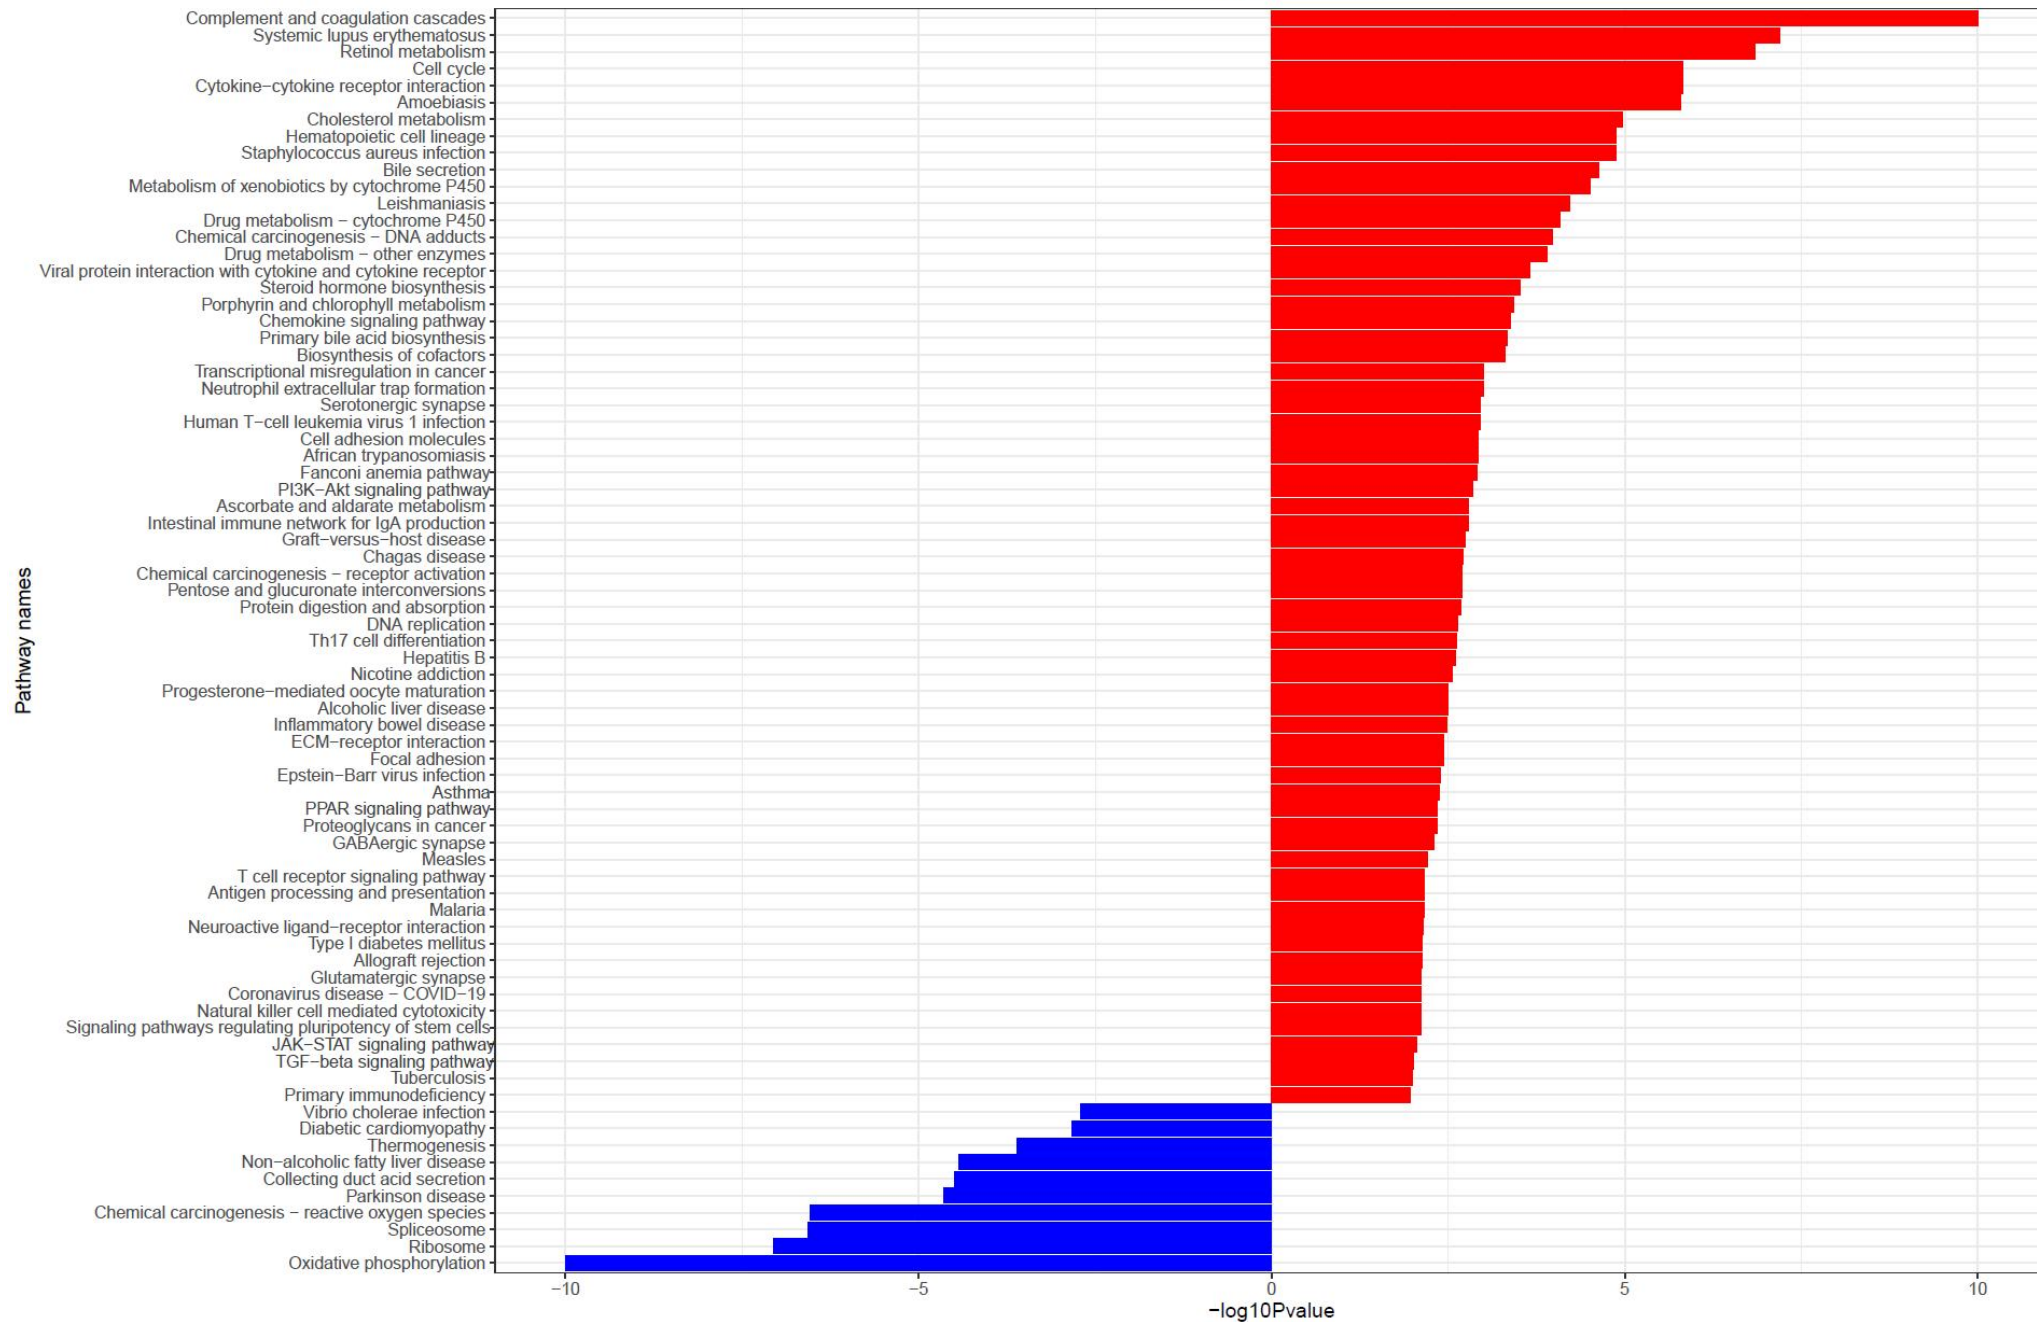

Figure S6: GSEA analysis between E2F7<sup>high</sup> and E2F7<sup>low</sup> groups.

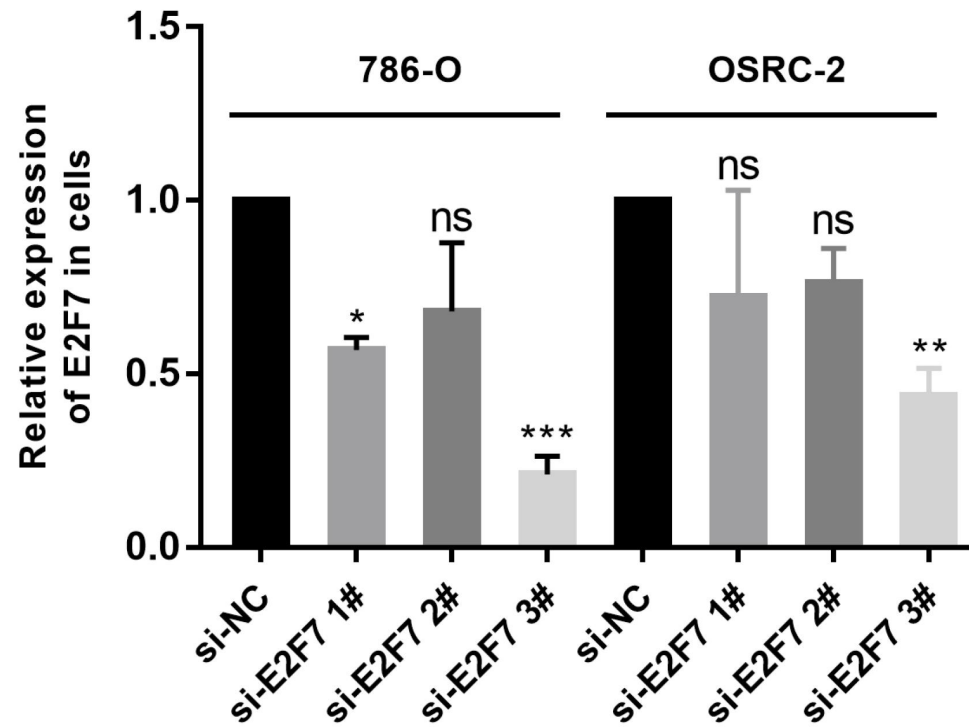

Figure S7: the mRNA expression of E2F7 in OSRC-2 and 786-O cells after siRNA transfection.

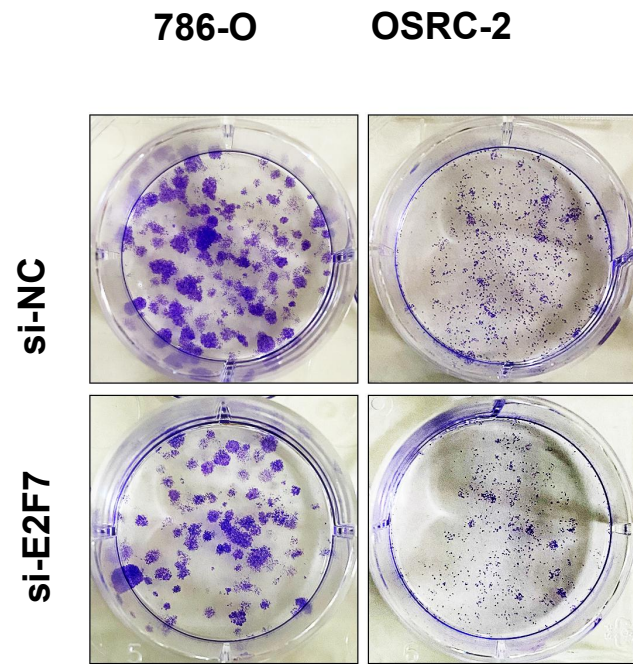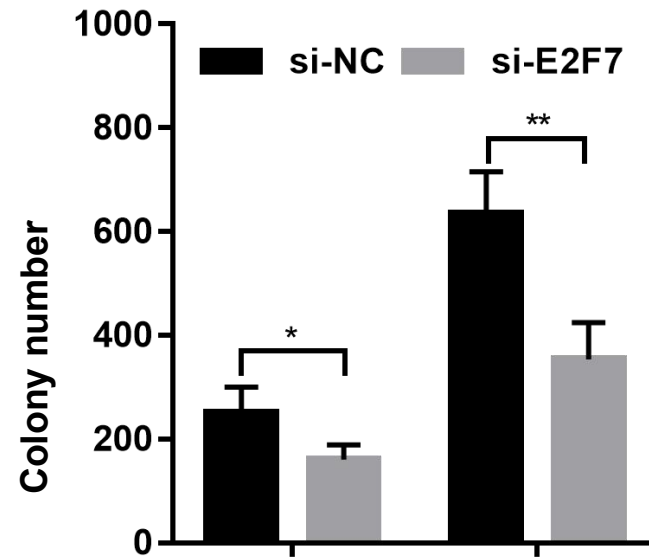

Figure S8: Colony formation assay



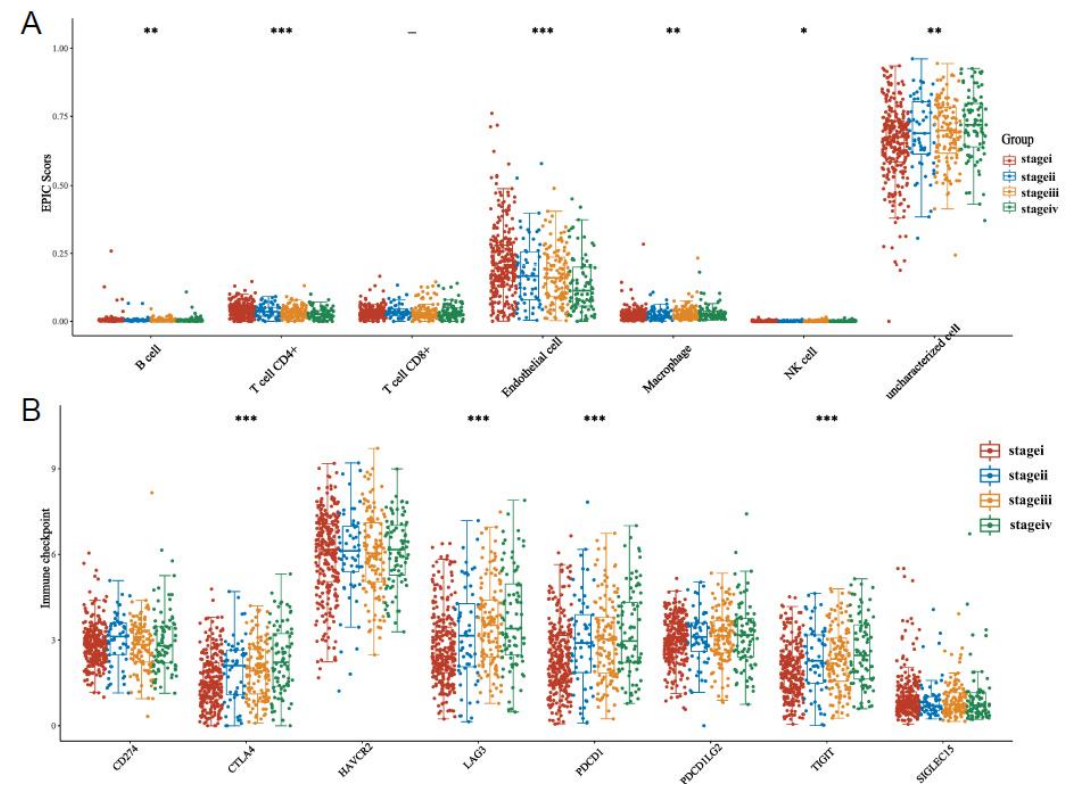

Figure S9: (A) Immune cell infiltration levels in different pathologic stages of KIRC. (B) Expression of immune checkpoint genes in different pathologic stages of KIRC.

E2F7, JNJ-38877605

Cor=0.459,  $p < 0.001$

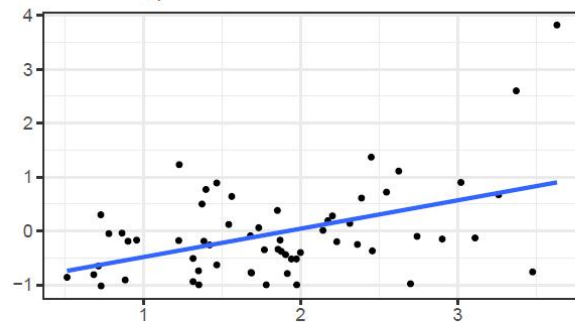

E2F7, AMG-458

Cor=0.402,  $p = 0.001$

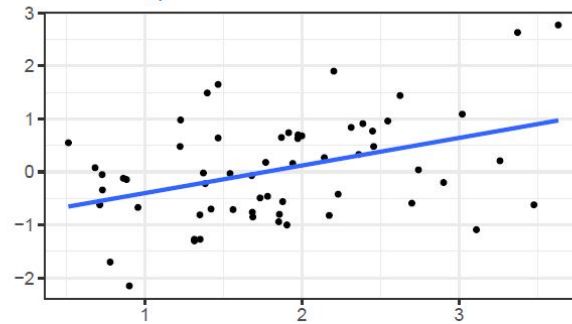

E2F7, Cabozantinib

Cor=0.390,  $p = 0.002$

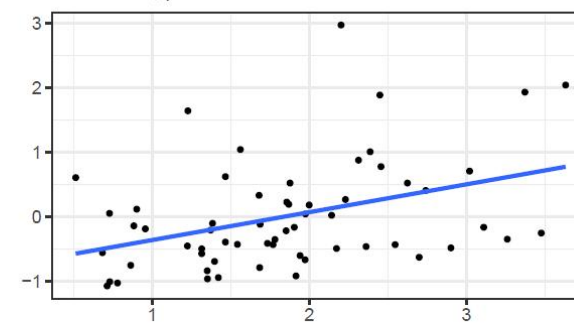

E2F7, SGX-523

Cor=0.382,  $p = 0.003$

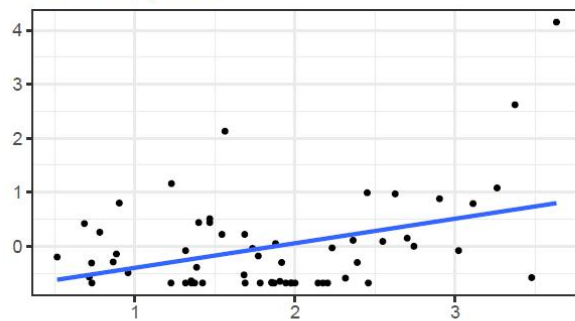

E2F7, AZD-5363

Cor=0.377,  $p = 0.003$

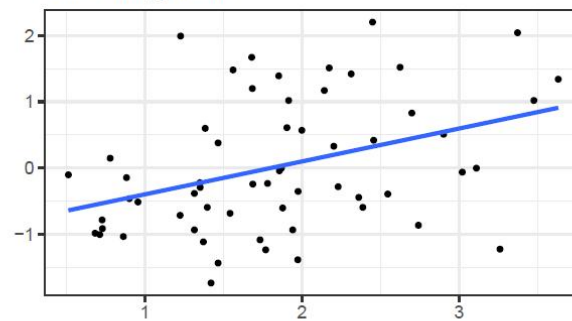

E2F7, BMS-777607

Cor=0.358,  $p = 0.005$

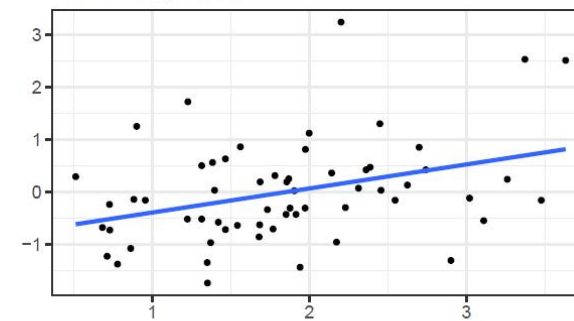

E2F7, PF-04217903

Cor=0.346,  $p = 0.007$

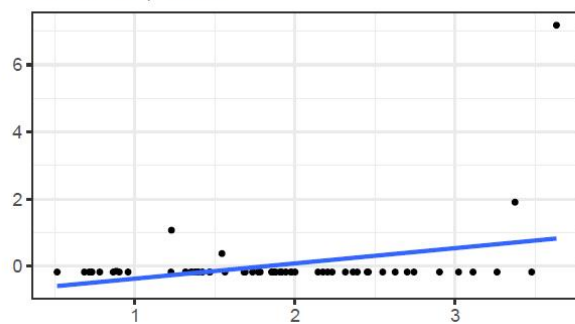

E2F7, ENMD-2076

Cor=0.336,  $p = 0.009$

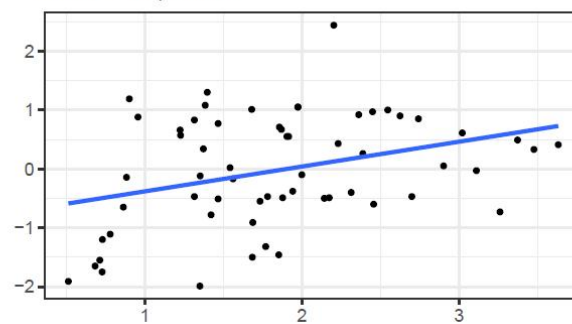

E2F7, Quizartinib

Cor=0.308,  $p = 0.017$

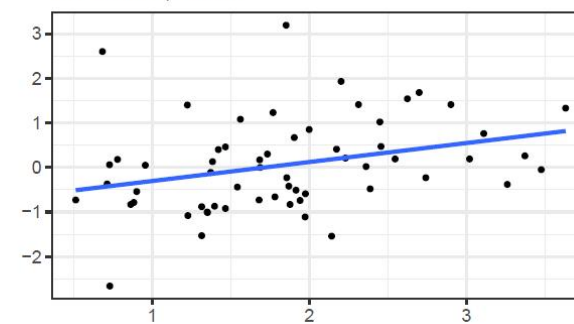

Figure S10: Correlation between drug sensitivity and the expression of E2F7 in KIRC

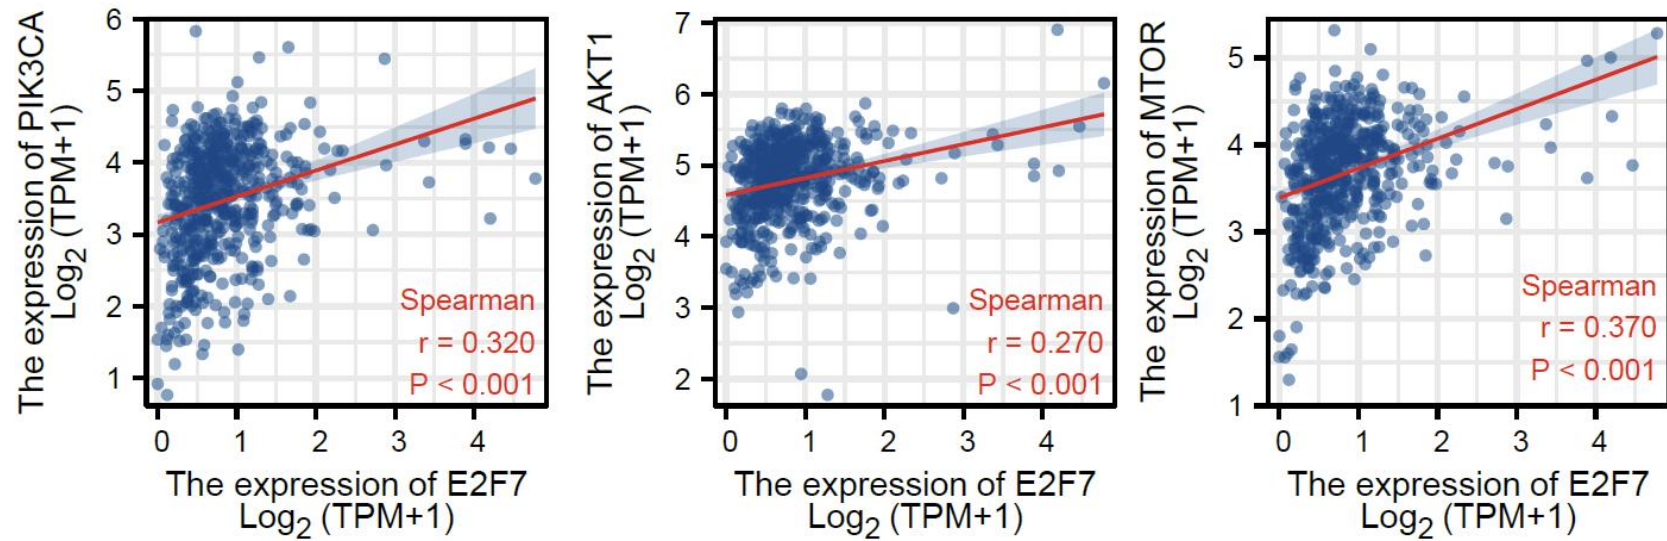

Figure S11: Relationship between E2F7 expression and PI3K/AKT1/mTOR signaling pathway



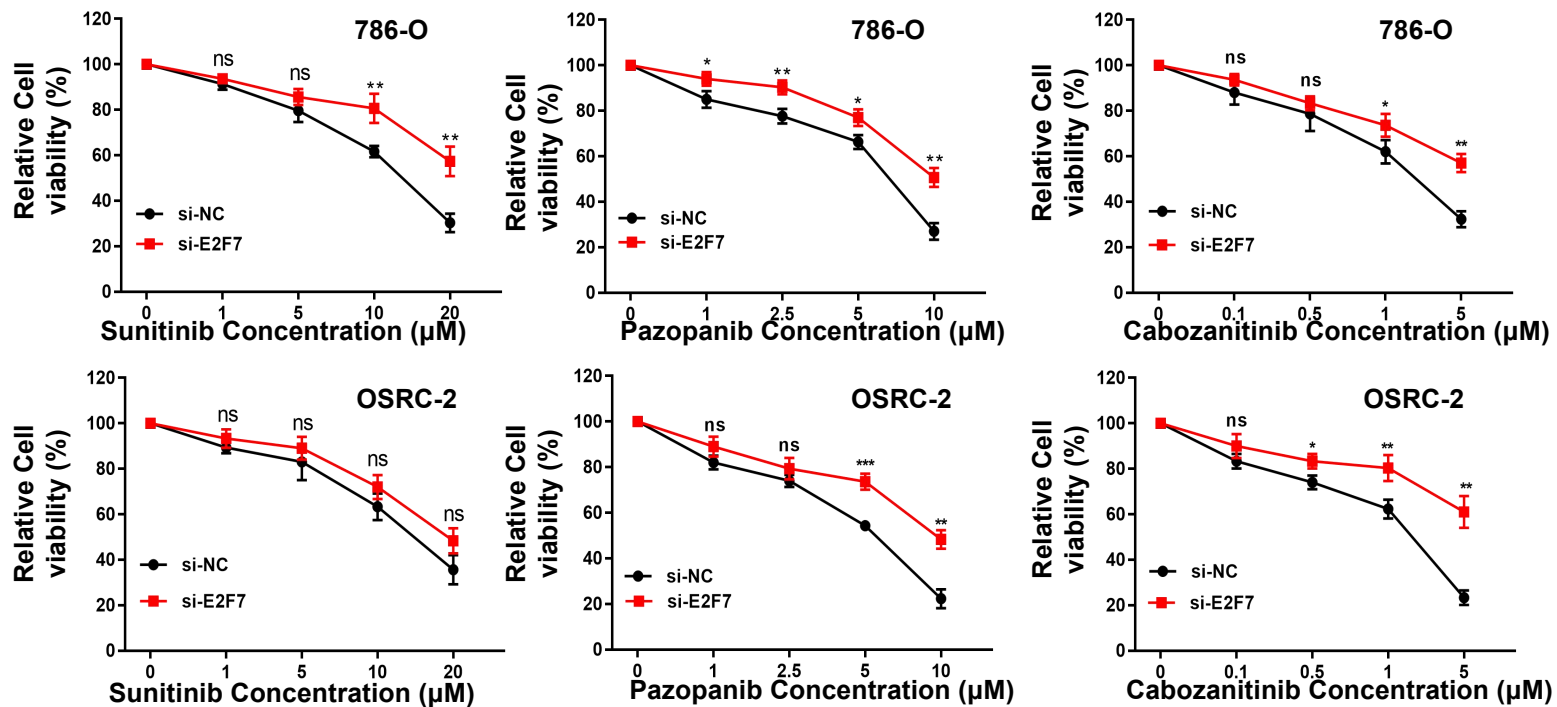

Figure S12: The drug sensitivities of sunitinib, pazopanib, and cabozantinib in 786-O and OSRC-2 cell lines at 48 h after transfection under different concentration. (relative cell viability =  $[(At-Ab) / (Ac-Ab)] \times 100\%$ ; As: absorbance of treatment; Ac: absorbance of control; Ab: absorbance of blank)
